# Supplementary material for: Blood transcriptome analysis of the crosstalk between ELF1 and OA
Source: Research Square preprint supplement (doi:10.21203/rs.3.rs-5647795/v1), 2024-12-27
Supplement: Supplementary file 1 [file 812476e87cd192d3c10468f3.docx]

**Reagents, antibodies, software, algorithms**

**1.CCK8 cell proliferation assay**

**1.1 The main reagents of the experiment**

| **Reagent** | **Producer** | **Article number** | **Batch number** |
| --- | --- | --- | --- |
| CCK8 detection kit | GLPBIO | GK100001 | 219563 |
| pancreatin | Biosharp | BL501B | 23349463 |
| PBS | Servicebio | G4207-500ML | GA23010022528 |
| Human chondrocyte culture medium | Punosai | CM-H107 | WH01112207SP08 |
| IL-1β | Nearshore protein | CG93 | 0332225ED02 |

**1.2 Experiment equipment**

| **Name** | **Producer** | **Model** |
| --- | --- | --- |
| pipetting gun | Thermo scientific | FINNPIPETTE®F3 |
| inverted microscope | OLYMPUS | CKX53 |
| centrifuge | Anhui Jiawen Instrument Equipment Co., Ltd. | JW-1024 |
| incubator | Thermo scientific | 3111 |
| benchtop | Shanghai Lichen Instrument Technology Co., Ltd. | SW-CJ-2D |
| Digital display water bath pot | Shanghai Lichen Instrument Technology Co., Ltd. | HH-4 |
| enzyme calibration | Reedu | RT6100 |

**2.Real-time fluorescent quantitative PCR experimental report**

**2.1 Fluorescence quantitative PCR reaction**

**2.1.1 The cDNA was taken as a template for fluorescence quantification, and the reaction system was as follows :**

| **System** | **Volume** |
| --- | --- |
| Taq SYBR Green qPCR Premix(Universal) | 10uL |
| Forward Primer（10uM） | 0.4uL |
| Reverse Primer （10uM） | 0.4uL |
| cDNA | 3uL |
| RNase Free water | 6.2uL |
| Total | 20uL |

| **temperature** | **time** | |
| --- | --- | --- |
| 95℃ | 30s | |
| 95℃ | 40 cycles | 15s |
| 60℃ | 30s |

**2.1.2 The reaction conditions are as follows :**

**2.1.3 Primers for each detection index :**

| **Gene** | **Amplicon Size**  **（bp）** | **Forward primer**  **（5'→3'）** | **Reverse primer**  **（5'→3'）** |
| --- | --- | --- | --- |
| Hu-β-actin | 96 | CCCTGGAGAAGAGCTACGAG | GGAAGGAAGGCTGGAAGAGT |
| Hu-ELF1 | 92 | CCACGCAGTCTCCATATCCT | GGTTCTAGCTGCTTCTCCCT |
| Hu-JUN | 105 | CGTGAAGTGACGGACTGTTC | GTAGCCATAAGGTCCGCTCT |
| Hu-JUND | 153 | CGGAGGATGGAAACACCCTT | CGCGTCCTTCTTCATCATGC |
| Hu-MAFF | 155 | GAAACCCAGTTCACGGATGG | CCCTCCCACCACATTTCTGA |
| Hu-PPP1R15A | 171 | GCCGAGGATGAAAGAGAAGC | TGACTCAGCTTCTCCCAAGG |
| Hu-ZFP36 | 97 | CCACTCCTATCAGCGTCTGG | CCGCTGCTGGCATATTCATC |
| Hu-CDKN1A | 157 | GTGGCAGTAGAGGCTATGGA | CAGGAGCTGGAAGGTGTTTG |
| Hu-ESF1 | 127 | GGACTGCGGACGTATTTGTT | TTCCCAAAATCTCGGGTCCT |
| Hu-ETS2 | 176 | CAGTGGCCTTATTGCATCCC | CAAACAGCCAGAACCATCCC |

**2.2 Experiment equipment**

| **Reagent** | **Producer** | **Article number** | **Batch number** |
| --- | --- | --- | --- |
| Trizol | Life technogies | G3013-100ML | CR2306056 |
| chloroform | Shanghai Suyi Chemical Reagent Co., Ltd. |  | 20191013 |
| absolute alcohol | Shanghai Suyi Chemical Reagent Co., Ltd. |  | 20230513 |
| isopropanol | Shanghai Suyi Chemical Reagent Co., Ltd. |  | 20220716 |
| DEPC-H2O | Generay Biotech | D1007 | 1803G26 |
| Taq SYBR Green qPCR Premix(Universal) | iScience | EG20117M | 1174803161 |
| All-in-One First-Strand Synthesis MasterMix(with dsDNase) | iScience | EG15133S | 1334815091 |
| primer synthesis | Sangon Biotech |  |  |

**2.3 Experiment equipment**

| **Name** | **Producer** | **Model** |
| --- | --- | --- |
| Ordinary PCR instrument | Bio-Rad | PTC-200 |
| Low speed mini centrifuge | Haimen Kylin-Bell Instrument Manufacturing Co., Ltd. | LX 300 |
| Bench high-speed freezing centrifuge | Zhengzhou Honghua Instrument Co., Ltd. | S-1-150S |
| micropipettor | Eppendorf, Germany |  |
| Fluorescence q-PCR instrument | ABI | StepOne Plus |
| Microplate mini centrifuge | Hangzhou Aosheng Instrument Co., Ltd. | MINI-P25 |
| ultramicrospectrophotometer | Nanjing Wuyi Technology Co., Ltd. | OD1000+ |

**3.Flow cytometry to detect cell apoptosis experiment**

**3.1The main reagents of the experiment**

| **Reagent** | **Producer** | **Article number** | **Batch number** |
| --- | --- | --- | --- |
| Apoptosis Kit | Elabscience | E-CK-A211 | AK16006 |
| pancreatin | Biosharp | BL501B | 23349463 |
| PBS | Servicebio | G4207-500ML | GA23010022528 |

**3.2 Experiment equipment**

| **Name** | **Producer** | **Model** |
| --- | --- | --- |
| flow cytometer | agilent | NovoCyte |
| pipetting gun | Thermo scientific | FINNPIPETTE®F3 |
| inverted microscope | OLYMPUS | CKX53 |
| centrifuge | Anhui Jiawen Instrument Equipment Co., Ltd. | JW-1024 |
| incubator | Thermo scientific | 3111 |
| benchtop | Shanghai Lichen Instrument Technology Co., Ltd. | SW-CJ-2D |
| Digital display water bath pot | Shanghai Lichen Bangxi Instrument Technology Co., Ltd. | HH-4 |

**4.cell culture**

**4.1The main reagents of the experiment**

| **Reagent** | **Producer** | **Article number** | **Batch number** |
| --- | --- | --- | --- |
| pancreatin | Biosharp | BL501B | 23349463 |
| PBS | Servicebio | G4207-500ML | GA23010022528 |
| Human chondrocyte culture medium | Punosai | CM-H107 | WH01112207SP08 |
| IL-1β | Nearshore protein | CG93 | 0332225ED02 |

**4.2 Experiment equipment**

| **Name** | **Producer** | **Model** |
| --- | --- | --- |
| pipetting gun | Thermo scientific | FINNPIPETTE®F3 |
| inverted microscope | OLYMPUS | CKX53 |
| centrifuge | Anhui Jiawen Instrument Equipment Co., Ltd. | JW-1024 |
| incubator | Thermo scientific | 3111 |
| benchtop | Shanghai Lichen Instrument Technology Co., Ltd. | SW-CJ-2D |
| Digital display water bath pot | Shanghai Lichen Bangxi Instrument Technology Co., Ltd. | HH-4 |
| blood counting chamber | Shanghai refinement | XB.K.25 |

**5.Cell transfection**

**5.1The main reagents of the experiment**

| **Reagent** | **Producer** | **Article number** | **Batch number** |
| --- | --- | --- | --- |
| [Lipo8000™](https://www.beyotime.com/product/C0533-0.5ml.htm" \t "https://www.beyotime.com/_blank) transfection reagent | Tsun Bi Yuntian | C0533 | 051723230915 |

**5.2experiment equipment**

| **Name** | **Producer** | **Model** |
| --- | --- | --- |
| pipetting gun | Thermo scientific | FINNPIPETTE®F3 |
| inverted microscope | OLYMPUS | CKX53 |
| centrifuge | Anhui Jiawen Instrument Equipment Co., Ltd. | JW-1024 |
| incubator | Thermo scientific | 3111 |
| benchtop | Shanghai Lichen Instrument Technology Co., Ltd. | SW-CJ-2D |
| Digital display water bath pot | Shanghai Lichen Bangxi Instrument Technology Co., Ltd. | HH-4 |
